# Supplementary material
Source: publisher figshare collection journal article supplement (https://sage.figshare.com/ndownloader/files/31300351)
Supplement: Supplementary file 1 [file 31300351]

Title - Supplementary Tables – Supplemental material for Lexical preference in second dialect acquisition in a second language.

Description – Supplemental material, Supplementary Tables, for Lexical preference in second dialect acquisition in a second language by Authors in International Journal of Bilingualism.

Table S1. Summary for model of language variety preference (L1D1 as baseline).

|  | Estimate | Std.Error | z value | Pr(>|z|) | Sign. |
| --- | --- | --- | --- | --- | --- |
| (Intercept) | 2.442 | 0.301 | 8.100 | <0.001 | *** |
| L1D2 | -4.076 | 0.352 | -11.575 | <0.001 | *** |
| L2D1 | -1.353 | 0.344 | -3.938 | <0.001 | *** |
| L2D2 | -2.534 | 0.348 | -7.285 | <0.001 | *** |

Table S2: Summary for model of language variety preference (L2D2 as baseline).

|  | Estimate | Std.Error | z value | Pr(>|z|) | Sign. |
| --- | --- | --- | --- | --- | --- |
| (Intercept) | -0.092 | 0.298 | -0.309 | 0.758 |  |
| L1D1 | 2.534 | 0.348 | 7.285 | <0.001 | *** |
| L1D2 | -1.542 | 0.344 | -4.485 | <0.001 | *** |
| L2D1 | 1.180 | 0.342 | 3.456 | <0.001 | *** |

Table S3: Summary for model of language variety preference for the L1D2 group.

|  | Estimate | Std.Error | z value | Pr(>|z|) | Sign. |
| --- | --- | --- | --- | --- | --- |
| (Intercept) | -2.738 | 0.447 | -6.123 | <0.001 | *** |
| Australia/USA | 9.872 | 2.960 | 3.335 | 0.001 | *** |

Table S4: Summary for model of language variety preference for the L2D1 group.

|  | Estimate | Std.Error | z value | Pr(>|z|) | Sign. |
| --- | --- | --- | --- | --- | --- |
| (Intercept) | 1.707 | 0.594 | 2.873 | 0.004 | ** |
| Australia.LoR | 0.212 | 0.058 | 3.644 | <0.001 | *** |
| Australia.attitudes | -0.120 | 0.036 | -3.315 | 0.001 | *** |

Table S5: Summary for model of language variety preference for the L2D2 group.

|  | Estimate | Std.Error | z value | Pr(>|z|) | Sign. |
| --- | --- | --- | --- | --- | --- |
| (Intercept) | 0.491 | 0.359 | 1.368 | 0.171 |  |
| USA.LoR | -0.198 | 0.066 | -2.999 | 0.003 | ** |
